# Supplementary material
Source: publisher figshare collection journal article supplement (https://plos.figshare.com/articles/dataset/_/1241878)
Supplement: Supplementary file [file 1]

| target | regulator | inhibition | experimental evidence       | target | regulator | inhibition | experimental evidence         |
|--------|-----------|------------|-----------------------------|--------|-----------|------------|-------------------------------|
| Nkx2.2 | Nkx6.1    | NO         | coexpressed                 | Irx3   | Nkx2.2    | ?          |                               |
|        | Olig2     | NO         | Novitch et al. <sup>1</sup> |        | Nkx6.1    | NO         | coexpressed                   |
|        | Pax6      | YES        | Briscoe et al. <sup>2</sup> |        | Olig2     | YES        | Novitch et al. <sup>1</sup>   |
|        | Irx3      | ?          |                             |        | Pax6      | NO         | coexpressed                   |
|        | Dbx2      | ?          |                             |        | Dbx2      | NO         | coexpressed                   |
|        | Nkx6.2    | ?          |                             |        | Nkx6.2    | NO         | coexpressed                   |
| Nkx6.1 | Dbx1      | ?          |                             |        | Dbx1      | NO         | coexpressed                   |
|        | Nkx2.2    | NO         | Briscoe et al. <sup>2</sup> | Dbx2   | Nkx2.2    | ?          |                               |
|        | Olig2     | NO         | Novitch et al. <sup>1</sup> |        | Nkx6.1    | YES        | Briscoe et al. <sup>2</sup>   |
|        | Pax6      | NO         | coexpressed                 |        | Olig2     | YES        | Novitch et al. <sup>1</sup>   |
|        | Irx3      | NO         | coexpressed                 |        | Pax6      | NO         | Briscoe et al. <sup>2</sup>   |
|        | Dbx2      | YES        | Briscoe et al. <sup>2</sup> |        | Irx3      | NO         | coexpressed                   |
| Olig2  | Nkx6.2    | ?          |                             |        | Nkx6.2    | NO         | coexpressed                   |
|        | Dbx1      | ?          |                             |        | Dbx1      | NO         | coexpressed                   |
|        | Nkx2.2    | YES        | Novitch et al. <sup>1</sup> | Nkx6.2 | Nkx2.2    | ?          |                               |
|        | Nkx6.1    | NO         | Novitch et al. <sup>1</sup> |        | Nkx6.1    | YES        | Vallstedt et al. <sup>3</sup> |
|        | Pax6      | NO         | coexpressed                 |        | Olig2     | ?          |                               |
|        | Irx3      | YES        | Novitch et al. <sup>1</sup> |        | Pax6      | NO         | coexpressed                   |
| Pax6   | Dbx2      | ?          |                             |        | Irx3      | NO         | coexpressed                   |
|        | Nkx6.2    | ?          |                             |        | Dbx2      | NO         | coexpressed                   |
|        | Dbx1      | ?          |                             |        | Dbx1      | YES        | Vallstedt et al. <sup>3</sup> |
|        | Nkx2.2    | YES        | Briscoe et al. <sup>2</sup> | Dbx1   | Nkx2.2    | ?          |                               |
|        | Nkx6.1    | NO         | coexpressed                 |        | Nkx6.1    | ?          |                               |
|        | Olig2     | NO         | coexpressed                 |        | Olig2     | ?          |                               |
|        | Irx3      | NO         | coexpressed                 |        | Pax6      | NO         | coexpressed                   |
|        | Dbx2      | NO         | coexpressed                 |        | Irx3      | NO         | coexpressed                   |
|        | Nkx6.2    | NO         | coexpressed                 |        | Dbx2      | NO         | coexpressed                   |
|        | Dbx1      | NO         | coexpressed                 |        | Nkx6.2    | YES        | Vallstedt et al. <sup>3</sup> |

**Table S-1 Inhibitory links between transcription factors (TFs) based on experimental studies.** References correspond to confirmed connections or the absence of them. We assumed the absence of transcriptional inhibition if two TFs were coexpressed in at least one neural progenitor cell type: this information is also depicted.

## References

- [1] Novitch B, Chen A, Jessell T (2001) Coordinate regulation of motor neuron subtype identity and pan-neuronal properties by the bHLH repressor Olig2. *Neuron* 31: 773–789.
- [2] Briscoe J, Pierani A, Jessell T, Ericson J (2000) A homeodomain protein code specifies progenitor cell identity and neuronal fate in the ventral neural tube. *Cell* 101: 435–445.
- [3] Vallstedt A, Muhr J, Pattyn A, Pierani A, Mendelsohn M, et al. (2001) Different levels of repressor activity assign redundant and specific roles to Nkx6 genes in motor neuron and interneuron specification. *Neuron* 31: 743–755.
