# Supplementary material
Source: publisher figshare collection journal article supplement (https://plos.figshare.com/articles/dataset/_/1241878)
Supplement: Supplementary file [file 1]

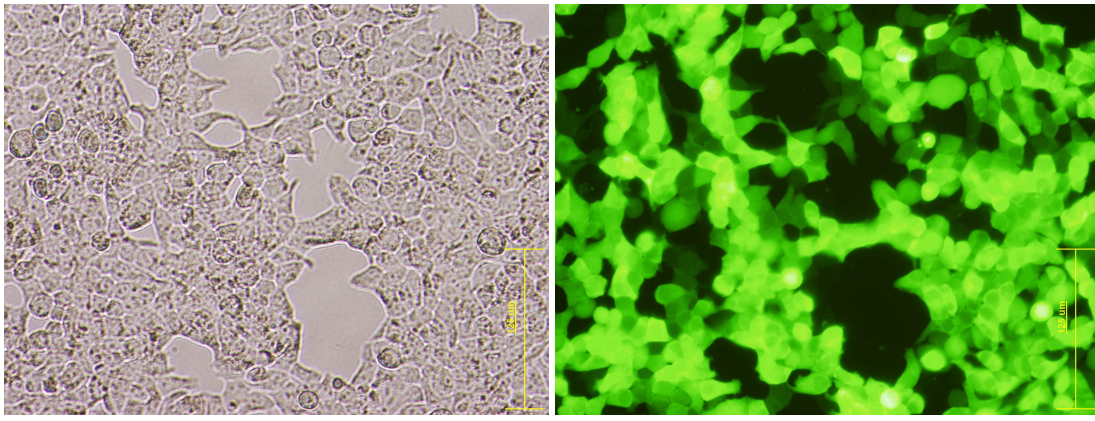

**Figure S-1 Transcription efficiency in HEK293T by fluorescent imaging of GFP-expression.** There was no fluorescent signal in the negative control condition. Brightfield image (a) and fluorescent image (b) of the same visual field at 200x magnification of a representative sample.
