# Supplementary material
Source: publisher figshare collection journal article supplement (https://plos.figshare.com/articles/dataset/_/1241878)
Supplement: Supplementary file [file 1]

| Attractor state          | cell type |
|--------------------------|-----------|
| (0, 0, 0, 1, 1, 1, 1, 0) | p1        |
| (1, 0, 0, 0, 1, 1, 0, 1) | -         |
| (1, 0, 0, 0, 1, 1, 1, 0) | -         |
| (0, 1, 0, 1, 1, 0, 0, 1) | p2        |
| (0, 1, 1, 1, 0, 0, 0, 1) | -         |
| (0, 0, 0, 1, 1, 1, 0, 1) | p0        |
| (1, 1, 0, 0, 1, 0, 0, 1) | -         |

**Table S-1 Boolean attractor states.** Binary representation of the attractors states of the Boolean model of the GRN assembled from literature results (see figure 2(a)) in the order (Nkx2.2, Nkx6.1, Olig2, Pax6, Irx3, Dbx2, Nkx6.2, Dbx1) and the corresponding neural progenitor cell type if it exists (cf. figure 1). The attractor states do not account for pMN and p3 cell types and some of the attractors do not correspond to existing cell types.
