# Supplementary material
Source: publisher figshare collection journal article supplement (https://plos.figshare.com/articles/dataset/_/1241878)
Supplement: Supplementary file [file 1]

A

|         | pcDNA3-Nkx2.2 | Amaxa-GFP |
|---------|---------------|-----------|
| Nkx2.2  | 3             | 1.5       |
| control | 0             | 4.5       |

B

|      | promoterless<br>pGL4.12 | pGL4.12-Irx3 | pRL-TK | pcDNA3-Nkx2.2 | Amaxa-GFP |
|------|-------------------------|--------------|--------|---------------|-----------|
| Irx  | 0                       | 0.5          | 0.1    | 0             | 3.5       |
| pB   | 0.5                     | 0            | 0.1    | 0             | 3.5       |
| N1   | 0                       | 0.5          | 0.1    | 0.5           | 3         |
| N2   | 0                       | 0.5          | 0.1    | 1             | 2.5       |
| N3   | 0                       | 0.5          | 0.1    | 1.5           | 2         |
| pB_N | 0.5                     | 0            | 0.1    | 1.5           | 2         |

**Table S-1 DNA content in CaCl<sub>2</sub> transfected cells for luciferase (A) and qPCR (B) measurements.** HEK293T cells were transfected with different amounts of plasmids to conduct qPCR and luciferase measurements (see results in figures 4 and 5). The indicated molar ratio of each plasmid was added to the transfection medium for each condition.
